# Supplementary material
Source: ML conference proceedings conference paper supplement (https://openaccess.thecvf.com/content/WACV2025/html/Yang_Transferring_Foundation_Models_WACV_2025_paper.html)
Supplement: Supplementary file 1 [file Yang_Transferring_Foundation_Models_WACV_2025_supplemental.pdf]

# Transferring Foundation Models for Generalizable Robotic Manipulation Supplementary Material

Jiange Yang<sup>1</sup>, Wenhui Tan<sup>2</sup>, Chuhao Jin<sup>2</sup>, Keling Yao<sup>3</sup>, Bei Liu<sup>4</sup>,  
Jianlong Fu<sup>4</sup>, Ruihua Song<sup>2</sup>, Gangshan Wu<sup>1</sup>, Limin Wang<sup>1,5\*</sup>

<sup>1</sup>State Key Laboratory for Novel Software Technology, Nanjing University, China

<sup>2</sup>Renmin University of China

<sup>3</sup>The Chinese University of Hong Kong, Shenzhen

<sup>4</sup>Microsoft Research <sup>5</sup>Shanghai AI Lab

jiangeyang.jgy@gmail.com, {tanwenhui404, jinchuhao, rsong}@ruc.edu.cn,  
120090220@link.cuhk.edu.cn, {jianf, Bei.Liu}@microsoft.com, {gswu, lmwang}@nju.edu.cn

## 1. Low-cost dual-arm robot experiments details.

In this section, we report the experimental setup details of our TPM extended to new low-cost dual-arm robot capabilities for folding and stacking skills. Specifically, we co-fine-tune the previous TPM model weight using 50 new demonstrations and deploy it using Mixformer-small [1] and SAM-tiny [2]. The demos can be seen Fig 1. It is worth mentioning that our low-cost dual-arm does not require additional motion planning time due to without movelt calls.

## References

- [1] Yutao Cui, Tianhui Song, Gangshan Wu, and Limin Wang. Mixformerv2: Efficient fully transformer tracking. *arXiv preprint arXiv:2305.15896*, 2023. 1
- [2] Chaoning Zhang, Dongshen Han, Yu Qiao, Jung Uk Kim, Sung-Ho Bae, Seungkyu Lee, and Choong Seon Hong. Faster segment anything: Towards lightweight sam for mobile applications. *arXiv preprint arXiv:2306.14289*, 2023. 1

---

\*Corresponding author.

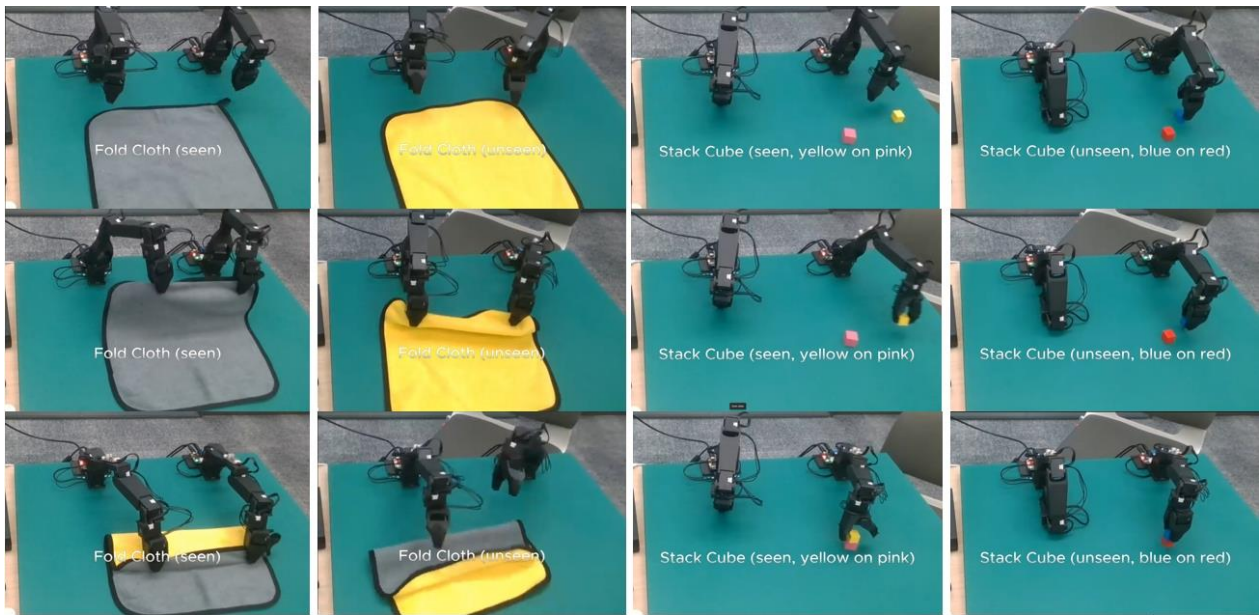

Figure 1. The demos of folding cloth and stacking cube skills.
